# Supplementary material for: Bifidobacterium animalis subsp. lactis and arginine mixture intake improves cognitive flexibility in mice
Source: PubMed Central journal article supplement (PMC10279864; doi:10.3389/fnut.2023.1164809), 2023-06-06
Supplement: Data_Sheet_1.pdf [file Data_Sheet_1.pdf]

Supplementary Table S1. Scoring system of the behaviors

| Scoring items                              | Behaviors                                                                                                                            | Data presented in |
|--------------------------------------------|--------------------------------------------------------------------------------------------------------------------------------------|-------------------|
| 1 <sup>st</sup> -choice incorrect diagonal | Choose (nose-poke) to incorrect spots, on the incorrect diagonal line at the first choice of the trial                               | Fig. 2A, C, D     |
| Diagonal move                              | Diagonal move from the active spot to next active spot on the correct diagonal line                                                  | Fig. 2B           |
| Adjacent move                              | Adjacent move from the active spot on the correct diagonal line to either of the two spots on the incorrect diagonal line            | Fig. 2B           |
| Re-entry move                              | Choose (nose-poke) to the same spot consecutively (Move from the active spot to the next inactive spot on the correct diagonal line) | Fig. 2B           |
| Diagonal correct move                      | Two consecutive choices (nose-pokes) on correct diagonal line                                                                        | Fig. 3            |
| Diagonal error move                        | Two consecutive choices (nose-pokes) on incorrect diagonal line                                                                      | Fig. 3            |

Supplementary Table S2. The cumulative diagonal correct move counts at the 50th, 100th, and 200th choice after the reversal in first session of each reversal

| The first 50 choices  |           |            |            |            |            |             |
|-----------------------|-----------|------------|------------|------------|------------|-------------|
|                       | Rev. 1-1  | Rev. 2-1   | Rev. 3-1   | Rev. 4-1   | Rev. 5-1   | Rev. 6-1    |
| Control               | 0.57±0.29 | 1.85±0.73  | 1.71±0.89  | 0.85±0.40  | 2.14±0.88  | 2.14±0.63   |
| Bifal+Arg             | 0.28±0.18 | 2.00±0.53  | 1.71±0.68  | 1.71±0.47  | 2.42±0.94  | 3.85±1.20   |
| The first 100 choices |           |            |            |            |            |             |
|                       | Rev. 1-1  | Rev. 2-1   | Rev. 3-1   | Rev. 4-1   | Rev. 5-1   | Rev. 6-1    |
| Control               | 1.00±0.53 | 5.28±2.21  | 4.85±0.93  | 4.00±1.51  | 5.28±1.35  | 9.28±2.27   |
| Bifal+Arg             | 1.14±0.55 | 4.57±1.17  | 6.85±1.72  | 6.00±1.57  | 9.42±1.92  | 14.71±5.02  |
| The first 200 choices |           |            |            |            |            |             |
|                       | Rev. 1-1  | Rev. 2-1   | Rev. 3-1   | Rev. 4-1   | Rev. 5-1   | Rev. 6-1    |
| Control               | 3.57±1.50 | 15.28±6.23 | 15.71±3.22 | 22.14±7.37 | 28.71±8.03 | 48.28±10.59 |
| Bifal+Arg             | 4.42±0.71 | 10.28±1.61 | 24.57±2.93 | 19.00±3.11 | 34.85±7.48 | 51.57±14.49 |
| Mean ± SEM            |           |            |            |            |            |             |
